# Supplementary material for: Gestational weight gain in low-income and middle-income countries: a modelling analysis using nationally representative data
Source: PubMed Central journal article supplement (PMC7661366; doi:10.1136/bmjgh-2020-003423), 2020-11-11
Supplement: bmjgh-2020-003423supp001.pdf [file bmjgh-2020-003423supp001.pdf]

**Appendix 1****Gestational weight gain estimates from the DHS datasets included in the analysis**

| Country                          | Year of DHS survey | Point estimate (kg) | Lower limit of 95% confidence interval (kg) | Upper limit of 95% confidence interval (kg) |
|----------------------------------|--------------------|---------------------|---------------------------------------------|---------------------------------------------|
| Albania                          | 2017               | 18.9                | 13.1                                        | 24.7                                        |
| Albania                          | 2008               | 10.8                | 2.4                                         | 19.2                                        |
| Armenia                          | 2015               | 25.9                | 16.9                                        | 35.0                                        |
| Armenia                          | 2005               | 10.5                | -0.8                                        | 21.8                                        |
| Armenia                          | 2000               | 12.6                | 4.9                                         | 20.2                                        |
| Azerbaijan                       | 2006               | 11.3                | 5.7                                         | 16.9                                        |
| Bangladesh                       | 2014               | 9.9                 | 7.7                                         | 12.1                                        |
| Bangladesh                       | 2011               | 8.9                 | 6.5                                         | 11.2                                        |
| Bangladesh                       | 2007               | 11.7                | 8.9                                         | 14.4                                        |
| Bangladesh                       | 2004               | 7.7                 | 5.6                                         | 9.8                                         |
| Bangladesh                       | 1999               | 7.1                 | 4.6                                         | 9.6                                         |
| Bangladesh                       | 1996               | 7.6                 | 4.7                                         | 10.5                                        |
| Benin                            | 2017               | 8.3                 | 5.2                                         | 11.4                                        |
| Benin                            | 2011               | 5.4                 | 3.0                                         | 7.8                                         |
| Benin                            | 2006               | 6.3                 | 4.4                                         | 8.2                                         |
| Benin                            | 2001               | 8.4                 | 6.2                                         | 10.7                                        |
| Benin                            | 1996               | 11.6                | 7.6                                         | 15.5                                        |
| Bolivia                          | 2008               | 8.8                 | 5.9                                         | 11.6                                        |
| Bolivia                          | 2003               | 13.6                | 10.7                                        | 16.5                                        |
| Bolivia                          | 1998               | 4.9                 | -0.1                                        | 9.8                                         |
| Bolivia                          | 1994               | 12.0                | 6.7                                         | 17.2                                        |
| Brazil                           | 1996               | 14.9                | 7.5                                         | 22.4                                        |
| Burkina Faso                     | 2010               | 7.4                 | 5.2                                         | 9.6                                         |
| Burkina Faso                     | 2003               | 4.8                 | 2.9                                         | 6.7                                         |
| Burkina Faso                     | 1998               | 7.1                 | 4.4                                         | 9.8                                         |
| Burkina Faso                     | 1993               | 4.5                 | 1.8                                         | 7.2                                         |
| Burundi                          | 2016               | 7.2                 | 3.2                                         | 11.1                                        |
| Burundi                          | 2010               | 6.6                 | 4.1                                         | 9.2                                         |
| Cambodia                         | 2014               | 10.2                | 7.6                                         | 12.9                                        |
| Cambodia                         | 2010               | 8.9                 | 5.8                                         | 12.1                                        |
| Cambodia                         | 2005               | 10.3                | 8.1                                         | 12.4                                        |
| Cambodia                         | 2000               | 5.8                 | 3.9                                         | 7.8                                         |
| Cameroon                         | 2011               | 8.5                 | 4.9                                         | 12.1                                        |
| Cameroon                         | 2004               | 10.3                | 6.5                                         | 14.2                                        |
| Cameroon                         | 1998               | 4.8                 | -2.0                                        | 11.6                                        |
| Central African Republic         | 1994               | 4.7                 | 1.1                                         | 8.3                                         |
| Chad                             | 2014               | 9.1                 | 7.0                                         | 11.3                                        |
| Chad                             | 2004               | 5.1                 | 2.4                                         | 7.8                                         |
| Chad                             | 1996               | 5.5                 | 2.9                                         | 8.2                                         |
| Colombia                         | 2010               | 13.7                | 11.0                                        | 16.4                                        |
| Colombia                         | 2005               | 14.8                | 12.2                                        | 17.4                                        |
| Colombia                         | 2000               | 10.4                | 6.9                                         | 14.0                                        |
| Colombia                         | 1995               | 11.9                | 8.7                                         | 15.0                                        |
| Comoros                          | 2012               | 14.1                | 8.3                                         | 19.9                                        |
| Comoros                          | 1996               | 9.6                 | -0.4                                        | 19.6                                        |
| Congo                            | 2011               | 14.5                | 6.6                                         | 22.4                                        |
| Congo                            | 2005               | 2.1                 | -1.7                                        | 6.0                                         |
| Democratic Republic of the Congo | 2013               | 5.6                 | 3.1                                         | 8.0                                         |
| Democratic Republic of the Congo | 2007               | 5.2                 | 1.6                                         | 8.8                                         |
| Cote d'Ivoire                    | 2011               | 2.1                 | -2.1                                        | 6.3                                         |
| Cote d'Ivoire                    | 1998               | 10.0                | 4.6                                         | 15.3                                        |
| Cote d'Ivoire                    | 1994               | 6.8                 | 3.0                                         | 10.6                                        |
| Dominican Republic               | 2013               | 13.2                | 7.5                                         | 19.0                                        |
| Dominican Republic               | 1996               | 11.0                | 6.4                                         | 15.6                                        |
| Dominican Republic               | 1991               | 13.0                | 7.7                                         | 18.3                                        |
| Egypt                            | 2014               | 4.3                 | 2.1                                         | 6.6                                         |
| Egypt                            | 2008               | 5.9                 | 3.5                                         | 8.2                                         |
| Egypt                            | 2005               | 3.2                 | 0.7                                         | 5.6                                         |
| Egypt                            | 2003               | 9.4                 | 5.7                                         | 13.1                                        |
| Egypt                            | 2000               | 6.8                 | 4.1                                         | 9.5                                         |
| Egypt                            | 1995               | 9.4                 | 5.6                                         | 13.2                                        |

|                 |      |      |      |      |
|-----------------|------|------|------|------|
| Egypt           | 1992 | 6.6  | 2.5  | 10.8 |
| Eswatini        | 2006 | 8.0  | 1.4  | 14.7 |
| Ethiopia        | 2016 | 6.9  | 4.5  | 9.2  |
| Ethiopia        | 2011 | 6.0  | 3.9  | 8.2  |
| Ethiopia        | 2005 | 4.4  | 1.0  | 7.8  |
| Ethiopia        | 2000 | 4.8  | 2.8  | 6.7  |
| Gabon           | 2012 | 6.2  | -1.1 | 13.5 |
| Gabon           | 2000 | 8.7  | 2.8  | 14.6 |
| The Gambia      | 2013 | 8.4  | 3.8  | 13.1 |
| Ghana           | 2014 | 1.3  | -3.8 | 6.4  |
| Ghana           | 2008 | 6.1  | 2.0  | 10.1 |
| Ghana           | 2003 | 4.1  | -0.1 | 8.2  |
| Ghana           | 1998 | 10.0 | 4.9  | 15.1 |
| Ghana           | 1993 | 4.3  | -0.4 | 9.0  |
| Guatemala       | 1998 | 12.7 | 7.7  | 17.8 |
| Guatemala       | 1995 | 9.0  | 6.1  | 11.8 |
| Guinea          | 2018 | 5.4  | 0.9  | 9.9  |
| Guinea          | 2012 | 7.8  | 4.4  | 11.3 |
| Guinea          | 2005 | 8.8  | 5.2  | 12.3 |
| Guinea          | 1999 | 10.3 | 7.4  | 13.1 |
| Guyana          | 2009 | 6.9  | -5.0 | 18.8 |
| Haiti           | 2016 | 13.5 | 7.8  | 19.1 |
| Haiti           | 2012 | 11.1 | 6.8  | 15.4 |
| Haiti           | 2005 | 14.5 | 9.2  | 19.8 |
| Haiti           | 2000 | 9.8  | 4.4  | 15.1 |
| Haiti           | 1994 | 9.5  | 4.4  | 14.6 |
| Honduras        | 2011 | 8.6  | 5.6  | 11.7 |
| Honduras        | 2005 | 9.9  | 7.0  | 12.8 |
| India           | 2015 | 8.2  | 7.7  | 8.8  |
| India           | 2005 | 7.9  | 7.0  | 8.8  |
| India           | 1998 | 6.8  | 6.0  | 7.7  |
| Jordan          | 2017 | 8.7  | 4.1  | 13.3 |
| Jordan          | 2012 | 14.6 | 6.5  | 22.8 |
| Jordan          | 2009 | 6.1  | 0.1  | 12.1 |
| Jordan          | 2007 | 8.4  | 3.7  | 13.1 |
| Jordan          | 2002 | 11.5 | 7.6  | 15.3 |
| Jordan          | 1997 | 14.7 | 10.4 | 18.9 |
| Kazakhstan      | 1999 | 7.7  | -4.1 | 19.4 |
| Kazakhstan      | 1995 | 13.7 | 6.8  | 20.7 |
| Kenya           | 2014 | 4.8  | 1.0  | 8.6  |
| Kenya           | 2008 | 4.0  | -1.8 | 9.8  |
| Kenya           | 2003 | 6.8  | 2.9  | 10.7 |
| Kenya           | 1998 | 6.2  | 2.0  | 10.5 |
| Kenya           | 1993 | 6.7  | 3.0  | 10.3 |
| Kyrgyz Republic | 2012 | 9.9  | 6.4  | 13.5 |
| Kyrgyz Republic | 1997 | 8.4  | 1.3  | 15.4 |
| Lesotho         | 2014 | 13.6 | 3.7  | 23.6 |
| Lesotho         | 2009 | 20.4 | 6.5  | 34.3 |
| Lesotho         | 2004 | 7.2  | -0.1 | 14.5 |
| Liberia         | 2013 | 9.3  | 5.8  | 12.7 |
| Liberia         | 2007 | 7.9  | 4.0  | 11.7 |
| Madagascar      | 2008 | 5.7  | 2.9  | 8.5  |
| Madagascar      | 2003 | 8.3  | 5.2  | 11.5 |
| Madagascar      | 1997 | 5.3  | 1.0  | 9.6  |
| Malawi          | 2015 | 8.4  | 5.8  | 10.9 |
| Malawi          | 2010 | 6.0  | 3.6  | 8.4  |
| Malawi          | 2004 | 8.5  | 6.8  | 10.3 |
| Malawi          | 2000 | 7.1  | 4.7  | 9.6  |
| Malawi          | 1992 | 7.2  | 3.4  | 10.9 |
| Maldives        | 2016 | 9.0  | -0.1 | 18.1 |
| Maldives        | 2009 | 11.9 | 7.4  | 16.4 |
| Mali            | 2018 | 1.9  | -2.8 | 6.5  |
| Mali            | 2012 | 8.0  | 4.4  | 11.7 |
| Mali            | 2006 | 5.0  | 3.2  | 6.8  |
| Mali            | 2001 | 6.3  | 4.4  | 8.2  |
| Mali            | 1995 | 5.1  | 2.2  | 7.9  |

|                       |      |      |      |      |
|-----------------------|------|------|------|------|
| Moldova               | 2005 | 10.0 | 1.6  | 18.4 |
| Morocco               | 2003 | 9.0  | 6.0  | 11.9 |
| Morocco               | 1992 | 6.1  | 1.5  | 10.8 |
| Mozambique            | 2011 | 5.7  | 3.5  | 7.8  |
| Mozambique            | 2003 | 3.6  | 1.7  | 5.4  |
| Mozambique            | 1997 | 9.5  | 4.5  | 14.4 |
| Myanmar               | 2015 | 8.0  | 4.6  | 11.5 |
| Namibia               | 2013 | 7.8  | 2.3  | 13.3 |
| Namibia               | 2006 | 9.8  | 5.5  | 14.2 |
| Namibia               | 1992 | 5.4  | -0.8 | 11.6 |
| Nepal                 | 2016 | 8.5  | 3.9  | 13.1 |
| Nepal                 | 2011 | 6.0  | 1.6  | 10.4 |
| Nepal                 | 2006 | 8.7  | 5.8  | 11.6 |
| Nepal                 | 2001 | 7.5  | 5.6  | 9.4  |
| Nepal                 | 1996 | 6.4  | 4.0  | 8.9  |
| Nicaragua             | 2001 | 5.4  | 2.0  | 8.9  |
| Nicaragua             | 1998 | 8.0  | 4.6  | 11.3 |
| Niger                 | 2012 | 7.1  | 4.1  | 10.1 |
| Niger                 | 2006 | 6.4  | 3.4  | 9.3  |
| Niger                 | 1998 | 6.7  | 4.1  | 9.2  |
| Niger                 | 1992 | 6.4  | 3.6  | 9.2  |
| Nigeria               | 2018 | 8.7  | 6.1  | 11.3 |
| Nigeria               | 2013 | 7.4  | 5.8  | 9.0  |
| Nigeria               | 2008 | 6.1  | 4.5  | 7.7  |
| Nigeria               | 2003 | 9.8  | 6.4  | 13.3 |
| Pakistan              | 2017 | 7.2  | 0.6  | 13.8 |
| Pakistan              | 2012 | 6.4  | 1.7  | 11.0 |
| Peru                  | 2012 | 8.2  | 5.3  | 11.0 |
| Peru                  | 2011 | 10.2 | 7.1  | 13.3 |
| Peru                  | 2010 | 11.2 | 8.1  | 14.3 |
| Peru                  | 2009 | 11.3 | 8.0  | 14.6 |
| Peru                  | 2006 | 12.5 | 10.1 | 14.9 |
| Peru                  | 2000 | 11.9 | 9.3  | 14.5 |
| Peru                  | 1996 | 6.8  | 3.6  | 9.9  |
| Peru                  | 1991 | 8.8  | 5.5  | 12.2 |
| Rwanda                | 2014 | 5.0  | 1.2  | 8.8  |
| Rwanda                | 2010 | 4.4  | 1.5  | 7.4  |
| Rwanda                | 2005 | 2.4  | -0.6 | 5.4  |
| Rwanda                | 2000 | 5.9  | 3.7  | 8.1  |
| Sao Tome and Principe | 2008 | 5.8  | -0.2 | 11.9 |
| Senegal               | 2010 | 8.4  | 2.6  | 14.3 |
| Senegal               | 2005 | 4.3  | -0.4 | 9.1  |
| Senegal               | 1992 | 6.3  | 2.9  | 9.7  |
| Sierra Leone          | 2013 | 4.0  | 0.6  | 7.5  |
| Sierra Leone          | 2008 | 7.1  | 3.0  | 11.2 |
| South Africa          | 2016 | 15.3 | 1.9  | 28.8 |
| Tajikistan            | 2017 | 12.1 | 9.2  | 15.1 |
| Tajikistan            | 2012 | 8.6  | 5.9  | 11.4 |
| Tanzania              | 2015 | 7.3  | 4.3  | 10.3 |
| Tanzania              | 2010 | 6.8  | 3.8  | 9.9  |
| Tanzania              | 2004 | 5.3  | 2.9  | 7.7  |
| Tanzania              | 1996 | 4.2  | -0.5 | 8.9  |
| Tanzania              | 1991 | 6.3  | 3.9  | 8.6  |
| Timor-Leste           | 2016 | 7.3  | 4.3  | 10.3 |
| Timor-Leste           | 2009 | 6.0  | 3.7  | 8.3  |
| Togo                  | 2013 | 5.2  | 1.1  | 9.3  |
| Togo                  | 1998 | 6.1  | 3.5  | 8.7  |
| Turkey                | 2013 | 12.3 | 4.8  | 19.7 |
| Turkey                | 2008 | 11.5 | 5.2  | 17.9 |
| Turkey                | 2003 | 5.2  | 0.5  | 9.8  |
| Turkey                | 1998 | 8.9  | 2.2  | 15.7 |
| Turkey                | 1993 | 5.8  | -1.0 | 12.7 |
| Uganda                | 2016 | 8.9  | 4.5  | 13.2 |
| Uganda                | 2011 | 5.6  | 1.5  | 9.6  |
| Uganda                | 2006 | 4.8  | 1.6  | 8.0  |
| Uganda                | 2000 | 6.8  | 3.3  | 10.3 |

|            |      |     |     |      |
|------------|------|-----|-----|------|
| Uganda     | 1995 | 5.7 | 3.3 | 8.1  |
| Uzbekistan | 1996 | 9.6 | 3.7 | 15.4 |
| Yemen      | 2013 | 5.8 | 3.9 | 7.6  |
| Zambia     | 2013 | 8.0 | 5.5 | 10.5 |
| Zambia     | 2007 | 9.1 | 6.1 | 12.0 |
| Zambia     | 2001 | 7.9 | 5.1 | 10.6 |
| Zambia     | 1996 | 8.6 | 4.8 | 12.5 |
| Zambia     | 1992 | 7.6 | 4.5 | 10.6 |
| Zimbabwe   | 2015 | 9.4 | 5.8 | 13.0 |
| Zimbabwe   | 2010 | 7.0 | 3.9 | 10.1 |
| Zimbabwe   | 2005 | 9.3 | 5.7 | 13.0 |
| Zimbabwe   | 1999 | 6.0 | 1.6 | 10.4 |
| Zimbabwe   | 1994 | 7.8 | 0.9 | 14.7 |
