# Supplementary material for: Gestational weight gain in low-income and middle-income countries: a modelling analysis using nationally representative data
Source: PubMed Central journal article supplement (PMC7661366; doi:10.1136/bmjgh-2020-003423), 2020-11-11
Supplement: bmjgh-2020-003423supp002.pdf [file bmjgh-2020-003423supp002.pdf]

**Appendix 2****Country-level predictors considered for the hierarchical model and their sources**

| <b>Country-level predictor</b>                                                                      | <b>Source</b>                                                                                                                                                                                          | <b>Decision</b>                          |
|-----------------------------------------------------------------------------------------------------|--------------------------------------------------------------------------------------------------------------------------------------------------------------------------------------------------------|------------------------------------------|
| Neonatal mortality rate (deaths per 1000 live births)                                               | United Nations Inter-agency Group for Child Mortality Estimation (UN IGME)<br><a href="http://www.childmortality.org/">http://www.childmortality.org/</a>                                              | Dropped during variable selection        |
| Low birthweight rate (%)                                                                            | UNICEF Data Warehouse <a href="http://data.unicef.org/">http://data.unicef.org/</a><br>World Bank Open Data <a href="https://data.worldbank.org/">https://data.worldbank.org/</a>                      | Dropped due to high level of missingness |
| Proportion of women receiving four or more antenatal care visits (%)                                | UNICEF Data Warehouse <a href="http://data.unicef.org/">http://data.unicef.org/</a>                                                                                                                    | Dropped due to high level of missingness |
| Cesarean section rate (%)                                                                           | UNICEF Data Warehouse <a href="http://data.unicef.org/">http://data.unicef.org/</a>                                                                                                                    | Dropped due to high level of missingness |
| Mean adult female body mass index (kg/m <sup>2</sup> )                                              | NCD Risk Factor Collaboration (NCD-RisC)<br><a href="http://ncdrisc.org/">http://ncdrisc.org/</a>                                                                                                      | Retained in the final model              |
| Gross domestic product per capita (current US dollars)                                              | World Bank Open Data <a href="https://data.worldbank.org/">https://data.worldbank.org/</a>                                                                                                             | Retained in the final model              |
| GINI index                                                                                          | World Bank Open Data <a href="https://data.worldbank.org/">https://data.worldbank.org/</a><br>Federal Reserve Economic Data<br><a href="https://fred.stlouisfed.org/">https://fred.stlouisfed.org/</a> | Dropped due to high level of missingness |
| Human Development Index                                                                             | United Nations Development Programme (UNDP)<br>Human Development Reports<br><a href="http://www.hdr.undp.org/">http://www.hdr.undp.org/</a>                                                            | Dropped due to multicollinearity         |
| Total fertility rate (births per woman)                                                             | World Bank Open Data <a href="https://data.worldbank.org/">https://data.worldbank.org/</a>                                                                                                             | Retained in the final model              |
| Adolescent fertility rate (births per 1000 women)                                                   | World Bank Open Data <a href="https://data.worldbank.org/">https://data.worldbank.org/</a>                                                                                                             | Dropped during variable selection        |
| Percentage of adolescents aged 15 to 19 years out of all women of reproductive age (15 to 49 years) | United Nations World Population Prospects 2019<br><a href="https://population.un.org/wpp/">https://population.un.org/wpp/</a>                                                                          | Dropped during variable selection        |
| Adult female literacy rate (%)                                                                      | World Bank Open Data <a href="https://data.worldbank.org/">https://data.worldbank.org/</a>                                                                                                             | Dropped due to high level of missingness |
