# Supplementary material for: Gestational weight gain in low-income and middle-income countries: a modelling analysis using nationally representative data
Source: PubMed Central journal article supplement (PMC7661366; doi:10.1136/bmjgh-2020-003423), 2020-11-11
Supplement: bmjgh-2020-003423supp003.pdf [file bmjgh-2020-003423supp003.pdf]

### Appendix 3

#### Gestational weight gain estimated for the year 2015 using hierarchical modeling

| Country                          | Point estimate (kg) | Lower limit of 95% uncertainty range (kg) | Upper limit of 95% uncertainty range (kg) |
|----------------------------------|---------------------|-------------------------------------------|-------------------------------------------|
| Afghanistan                      | 4.8                 | 0.4                                       | 9.2                                       |
| Albania                          | 9.2                 | 1.3                                       | 17.1                                      |
| Algeria                          | 7.1                 | 3.0                                       | 11.3                                      |
| Angola                           | 6.1                 | 2.2                                       | 10.0                                      |
| Argentina                        | 10.8                | 7.2                                       | 14.5                                      |
| Armenia                          | 11.3                | -2.5                                      | 25.1                                      |
| Azerbaijan                       | 11.1                | 6.3                                       | 15.8                                      |
| Bangladesh                       | 8.6                 | 4.0                                       | 13.2                                      |
| Belarus                          | 12.1                | 7.4                                       | 16.9                                      |
| Belize                           | 11.0                | 7.1                                       | 14.9                                      |
| Benin                            | 8.5                 | 3.0                                       | 13.9                                      |
| Bhutan                           | 8.0                 | 4.6                                       | 11.5                                      |
| Bolivia                          | 10.3                | 3.7                                       | 16.9                                      |
| Bosnia and Herzegovina           | 12.2                | 7.0                                       | 17.4                                      |
| Botswana                         | 8.8                 | 5.3                                       | 12.3                                      |
| Brazil                           | 14.0                | 2.8                                       | 25.1                                      |
| Bulgaria                         | 12.2                | 7.0                                       | 17.3                                      |
| Burkina Faso                     | 6.0                 | 2.0                                       | 9.9                                       |
| Burundi                          | 6.0                 | 1.4                                       | 10.7                                      |
| Cabo Verde                       | 9.0                 | 5.5                                       | 12.5                                      |
| Cambodia                         | 8.2                 | 3.8                                       | 12.7                                      |
| Cameroon                         | 7.5                 | 1.9                                       | 13.1                                      |
| Central African Republic         | 4.9                 | -2.4                                      | 12.2                                      |
| Chad                             | 5.8                 | 1.2                                       | 10.4                                      |
| China                            | 9.1                 | 5.2                                       | 13.1                                      |
| Colombia                         | 12.2                | 7.0                                       | 17.5                                      |
| Comoros                          | 10.2                | -0.7                                      | 21.1                                      |
| Congo                            | 4.1                 | -6.7                                      | 14.9                                      |
| Democratic Republic of the Congo | 5.1                 | 0.9                                       | 9.2                                       |
| Costa Rica                       | 11.3                | 7.8                                       | 14.7                                      |
| Cote d'Ivoire                    | 7.6                 | 1.5                                       | 13.7                                      |
| Cuba                             | 11.0                | 7.4                                       | 14.7                                      |
| Djibouti                         | 8.5                 | 5.1                                       | 11.8                                      |
| Dominica                         | 11.2                | 7.8                                       | 14.5                                      |
| Dominican Republic               | 11.9                | 5.5                                       | 18.2                                      |
| Ecuador                          | 10.6                | 7.3                                       | 13.9                                      |
| Egypt                            | 6.6                 | 2.0                                       | 11.2                                      |
| El Salvador                      | 10.9                | 7.6                                       | 14.2                                      |
| Equatorial Guinea                | 7.3                 | 3.1                                       | 11.6                                      |
| Eritrea                          | 6.6                 | 3.2                                       | 10.1                                      |
| Eswatini                         | 8.1                 | 1.1                                       | 15.1                                      |
| Ethiopia                         | 5.6                 | 1.5                                       | 9.8                                       |
| Fiji                             | 8.9                 | 3.8                                       | 14.1                                      |
| Gabon                            | 8.0                 | 3.4                                       | 12.7                                      |
| Georgia                          | 11.9                | 7.5                                       | 16.4                                      |
| Ghana                            | 6.3                 | 1.1                                       | 11.6                                      |
| Grenada                          | 11.1                | 7.7                                       | 14.5                                      |
| Guatemala                        | 11.6                | 5.5                                       | 17.6                                      |
| Guinea                           | 9.5                 | 5.3                                       | 13.7                                      |
| Guinea-Bissau                    | 6.6                 | 3.6                                       | 9.6                                       |
| Guyana                           | 6.9                 | -4.1                                      | 17.9                                      |
| Haiti                            | 11.4                | 4.1                                       | 18.7                                      |
| Honduras                         | 9.9                 | 5.3                                       | 14.5                                      |
| India                            | 7.5                 | 4.5                                       | 10.6                                      |
| Indonesia                        | 8.4                 | 4.8                                       | 12.0                                      |
| Iran                             | 8.1                 | 4.0                                       | 12.2                                      |
| Iraq                             | 6.9                 | 2.7                                       | 11.1                                      |
| Jamaica                          | 11.2                | 7.7                                       | 14.7                                      |
| Jordan                           | 11.3                | 3.9                                       | 18.7                                      |
| Kazakhstan                       | 9.8                 | 2.0                                       | 17.5                                      |
| Kenya                            | 6.8                 | 0.8                                       | 12.7                                      |

|                                |      |      |      |
|--------------------------------|------|------|------|
| Kiribati                       | 8.3  | 1.2  | 15.5 |
| Kosovo <sup>1</sup>            | ..   | ..   | ..   |
| Kyrgyz Republic                | 8.0  | -2.0 | 18.0 |
| Laos                           | 7.9  | 4.4  | 11.4 |
| Lebanon                        | 8.2  | 4.0  | 12.3 |
| Lesotho                        | 11.1 | -2.6 | 24.8 |
| Liberia                        | 7.8  | 3.5  | 12.0 |
| Libya                          | 8.2  | 4.4  | 11.9 |
| Madagascar                     | 6.7  | 2.4  | 11.0 |
| Malawi                         | 7.9  | 4.1  | 11.7 |
| Malaysia                       | 9.2  | 5.2  | 13.3 |
| Maldives                       | 11.7 | 3.2  | 20.2 |
| Mali                           | 6.0  | 2.4  | 9.6  |
| Marshall Islands               | 8.1  | 1.4  | 14.8 |
| Mauritania                     | 7.1  | 3.6  | 10.6 |
| Mauritius                      | 9.8  | 5.8  | 13.8 |
| Mexico                         | 11.0 | 7.6  | 14.4 |
| Micronesia                     | 8.9  | 2.1  | 15.7 |
| Moldova                        | 10.1 | 2.2  | 17.9 |
| Mongolia                       | 11.1 | 6.4  | 15.7 |
| Montenegro                     | 12.1 | 7.1  | 17.0 |
| Morocco                        | 7.4  | 1.0  | 13.8 |
| Mozambique                     | 6.4  | 0.9  | 11.9 |
| Myanmar                        | 8.3  | 3.6  | 13.0 |
| Namibia                        | 7.3  | 0.5  | 14.1 |
| Nauru                          | 9.6  | 2.3  | 16.8 |
| Nepal                          | 8.1  | 4.4  | 11.9 |
| Nicaragua                      | 7.3  | 1.9  | 12.8 |
| Niger                          | 6.1  | 2.1  | 10.1 |
| Nigeria                        | 7.7  | 2.2  | 13.3 |
| North Korea                    | 8.7  | 5.0  | 12.5 |
| North Macedonia                | 12.2 | 7.4  | 17.0 |
| Pakistan                       | 6.2  | -1.7 | 14.1 |
| Papua New Guinea               | 7.6  | 3.3  | 12.0 |
| Paraguay                       | 10.4 | 7.1  | 13.7 |
| Peru                           | 10.0 | 4.1  | 15.9 |
| Philippines                    | 8.0  | 4.5  | 11.6 |
| Romania                        | 12.3 | 7.3  | 17.3 |
| Russia                         | 12.2 | 7.1  | 17.2 |
| Rwanda                         | 4.9  | 0.0  | 9.8  |
| Samoa                          | 8.7  | 0.0  | 17.3 |
| Sao Tome and Principe          | 5.7  | -3.5 | 14.9 |
| Senegal                        | 5.7  | -0.4 | 11.8 |
| Serbia                         | 12.2 | 7.1  | 17.3 |
| Sierra Leone                   | 7.4  | 2.2  | 12.6 |
| Solomon Islands                | 7.1  | 1.9  | 12.3 |
| Somalia                        | 5.1  | 1.6  | 8.6  |
| South Africa                   | 9.2  | 1.4  | 17.0 |
| South Sudan <sup>1</sup>       | ..   | ..   | ..   |
| Sri Lanka                      | 8.6  | 5.0  | 12.2 |
| St. Lucia                      | 11.9 | 8.3  | 15.4 |
| St. Vincent and the Grenadines | 11.1 | 7.8  | 14.4 |
| Sudan                          | 5.7  | 1.4  | 10.0 |
| Suriname                       | 10.6 | 7.2  | 14.1 |
| Syria                          | 7.6  | 3.8  | 11.4 |
| Tajikistan                     | 7.9  | 0.5  | 15.2 |
| Tanzania                       | 5.5  | 1.4  | 9.6  |
| Thailand                       | 9.4  | 5.6  | 13.2 |
| The Gambia                     | 6.5  | 1.7  | 11.2 |
| Timor-Leste                    | 6.1  | 1.3  | 11.0 |
| Togo                           | 6.2  | 1.7  | 10.7 |
| Tonga                          | 8.9  | 0.6  | 17.3 |
| Tunisia                        | 7.9  | 3.9  | 11.9 |
| Turkey                         | 7.4  | 0.5  | 14.2 |
| Turkmenistan                   | 11.1 | 6.2  | 16.0 |
| Tuvalu                         | 9.1  | 2.2  | 16.0 |

|                    |      |     |      |
|--------------------|------|-----|------|
| Uganda             | 6.2  | 1.1 | 11.3 |
| Ukraine            | 12.1 | 7.5 | 16.7 |
| Uzbekistan         | 10.2 | 3.3 | 17.1 |
| Vanuatu            | 7.6  | 2.8 | 12.4 |
| Venezuela          | 10.7 | 6.8 | 14.6 |
| Vietnam            | 8.4  | 4.7 | 12.1 |
| West Bank and Gaza | 6.8  | 2.6 | 11.0 |
| Yemen              | 5.5  | 0.0 | 11.0 |
| Zambia             | 8.4  | 4.0 | 12.7 |
| Zimbabwe           | 6.9  | 1.1 | 12.6 |

<sup>1</sup>Estimates for South Sudan and Kosovo could not be computed due to the lack of sufficient covariate data in 2015.
